# Supplementary material for: Implication of the IL-10-Expression Signature in the Pathogenicity of Leptospira-Infected Macrophages
Source: PubMed Central journal article supplement (PMC9241676; doi:10.1128/spectrum.02595-21), 2022-05-31
Supplement: spectrum.02595-21-s001.pdf [file spectrum.02595-21-s001.pdf]

## *Supplemental Material*

### **Implication of the IL-10-expression signature in the pathogenicity of *Leptospira*-infected macrophages**

Li-Fang Chou,<sup>a</sup> Ting-Wen Chen,<sup>b,c,d</sup> Huang-Yu Yang,<sup>a,e,f</sup> Ya-Chung Tian,<sup>a,e,f</sup> Ming-Yang Chang,<sup>a,e,f</sup> Cheng-Chieh Hung,<sup>a,e,f</sup> Chih-Ho Lai,<sup>g,h</sup> Shen-Hsing Hsu,<sup>a</sup> Chung-Ying Tsai,<sup>a</sup> Yi-Ching Ko,<sup>a</sup> Jang-Hau Lian,<sup>i</sup> and Chih-Wei Yang<sup>a,e,f,#</sup>

<sup>a</sup>Kidney Research Center, Chang Gung Memorial Hospital, Linkou, Taiwan

<sup>b</sup>Institute of Bioinformatics and Systems Biology, National Yang Ming Chiao Tung University, Hsinchu, Taiwan

<sup>c</sup>Department of Biological Science and Technology, National Yang Ming Chiao Tung University, Hsinchu, Taiwan

<sup>d</sup>Center for Intelligent Drug Systems and Smart Bio-devices (IDS<sup>2</sup>B), National Yang Ming Chiao Tung University, Hsinchu, Taiwan

<sup>e</sup>Department of Nephrology, Chang Gung Memorial Hospital, Linkou, Taiwan

<sup>f</sup>College of Medicine, Chang Gung University, Taoyuan, Taiwan

<sup>g</sup>Department of Microbiology and Immunology, Chang Gung University, Taoyuan, Taiwan;

<sup>h</sup>Molecular Infectious Disease Research Center, Chang Gung Memorial Hospital, Taoyuan, Taiwan;

<sup>i</sup>Genomic Medicine Core Laboratory, Chang Gung Memorial Hospital, Linkou, Taiwan

Running Head: IL-10 expression in *Leptospiral*-infected macrophages

#Correspondence: Prof. Chih-Wei Yang; E-mail: [cwyang@ms1.hinet.net](mailto:cwyang@ms1.hinet.net); Kidney Research Center and Department of Nephrology, Chang Gung Memorial Hospital, Chang Gung University College of Medicine, 5 Fu-Shing St., Kueishan, Taoyuan, 333, Taiwan. Phone: +886-3-3281200 EXT.7756; Fax: +886-3-3282173

26 This article contains the following supplemental material

27 **FIG S1. Biological characterization of *Leptospira*-infected bone marrow-derived macrophages**

28 **(BMDMs).** (A) Changes in the density and shape of mitochondria in *Leptospira*-infected BMDMs.

29 Representative transmission electron microscopy images of BMDMs infected with *L. biflexa* (left) or

30 *L. interrogans* (right) for 2 h. Magnification: (upper row) 27,000x, scale bar: 2.0  $\mu\text{m}$ ; (lower row)

31 110,000x, scale bar: 1.0  $\mu\text{m}$ , area delineated by a rectangle in the top row. Black arrow and M indicate

32 mitochondria; N-Nucleus; LBP-*L. biflexa*; LIC- *L. interrogans*. (B) Transmission electron

33 microscopy images of intracellular leptospiral localization patterns in infected macrophages. Images

34 show *L. biflexa*-infected BMDMs at 2 h (upper row) and (lower row) 24 h post-infection (scale bar,

35 1.0  $\mu\text{m}$ ), and *L. interrogans*-infected BMDMs at 2 h (upper row) and (lower row) 24 h post-infection

36 (scale bar, 500 nm and 1.0  $\mu\text{m}$ , respectively). Black arrowheads show *L. biflexa*, arrows show *L.*

37 *interrogans*, and M\* and V indicate damaged mitochondria and vacuoles, respectively. (C) Amount

38 of *L. biflexa* in infected BMDMs was larger than the amount of *L. interrogans*. Quantification of the

39 total fluorescent area (upper row) and fluorescence intensity (lower row) in an infected cell population

40 at the single-cell level. An algorithm for measuring the total fluorescent area and assessing the total

41 cell number on an image was developed in Python 3.10.0 using OpenCV (Open-Source Computer

42 Vision, Intel Corp.). The total fluorescence intensity was measured using MetaMorph software. Cells

43 within 4 images (approximately 80 cells) were analyzed. P: *L. biflexa*-infected BMDMs, and C: *L.*

44 *interrogans*-infected BMDMs. BMDM, bone marrow-derived macrophage. (D) Induction of

45 apoptosis in BMDMs infected with *Leptospira* spp. After infection with leptospire for (upper row)

46 2 h and (lower row) 24 h, the percentage of apoptotic cells was detected using a fluorescein

47 isothiocyanate (FITC)-annexin V/propidium iodide (PI) double staining method and analyzed using

48 flow cytometry. Non-apoptotic cells (lower left quadrant); early apoptotic cells (lower right quadrant);

49 late apoptotic/necrotic cells (upper right quadrant).

50 **FIG S2. Macrophage responses after 24 h of infection with pathogenic *Leptospira* spp.** Plots  
51 obtained from gene set enrichment analysis of “HALLMARK\_UV\_RESPONSE\_UP” and  
52 “HALLMARK\_PI3K\_AKT\_MTOR\_SIGNALING” are shown in *L. interrogans*-infected BMDMs  
53 vs. uninfected BMDM groups but not in *L. biflexa*-infected BMDMs vs. uninfected BMDM groups.  
54 The green curve refers to calculation of the enrichment score. GSEA, gene set enrichment analysis;  
55 NES, normalized enrichment score; FDR, false discovery rate. Left panels show GSEA enrichment  
56 plots (score curves) and the heatmap on the right side of each panel shows the core enrichment genes  
57 (positively enriched associated molecules) contributing the most to the enriched pathway. Increased  
58 expression (red) and decreased expression (blue). C24: *L. interrogans*-infected BMDMs at 24 h post-  
59 infection and E24: uninfected BMDMs at 24 h. BMDM, bone marrow-derived macrophage.

60 **FIG S3. Representative flow cytometry plot showing the gating strategy to identify classically**  
61 **activated M1 or alternatively activated M2 macrophage subsets in leptospiral-infected BMDMs.**  
62 The cells were first morphologically gated using the forward light scatter area (FSC-A) and side light  
63 scatter area (SSC-A) to exclude cell debris. Viability gating was performed to select cells that were  
64 negative for the eBioscience fixable viability dye stain (Thermo Fisher Scientific, 65-0865-14), and  
65 cell doublets were excluded based on the FSC-A and FSH-height (FSH-H). Live cells were gated on  
66 CD11b<sup>+</sup>F4/80<sup>+</sup> cells (R1). Next, CD11b<sup>+</sup>F4/80<sup>+</sup> cells were analyzed for the expression of CD80 and  
67 CD206: R2: CD11b<sup>+</sup>F4/80<sup>+</sup>CD80<sup>+</sup> (classically activated M1) and R3: CD11b<sup>+</sup>F4/80<sup>+</sup>CD260<sup>+</sup>  
68 (alternatively activated M2).

69

70

71

72

73 **Tables and their legends**

74 **Table S1. Summary of sequencing data and alignment statistics**

75 **Table S2. Enriched canonical pathways of DEGs using Ingenuity Pathway Analysis.** The  
76 significance of canonical pathways was determined using a default threshold of  $p$ -values  $< 1E-5$ .

77 **Table S3. Candidate genes for Taqman probe ID.**

78 **Table S4. At 24 h after infection, pathogenic *Leptospira*-infected macrophages showed lower**  
79 **expression levels of gene transcripts compared to those in nonpathogenic *Leptospira*-infected**  
80 **macrophages.**

81 **Table S5. At 24 h after infection, pathogenic *Leptospira*-infected macrophages showed higher**  
82 **expression levels of gene transcripts compared to those in nonpathogenic *Leptospira*-infected**  
83 **macrophages.**

84 **Table S6. Pathways significantly enriched in Gene Set Enrichment Analysis.**

85 **Table S7. Core enrichment genes**

86

87

88

89

90

91

92 **FIG S1.**

93

94

95

96

97

98

99

100

101

102

103

104

105

106

107

108

109

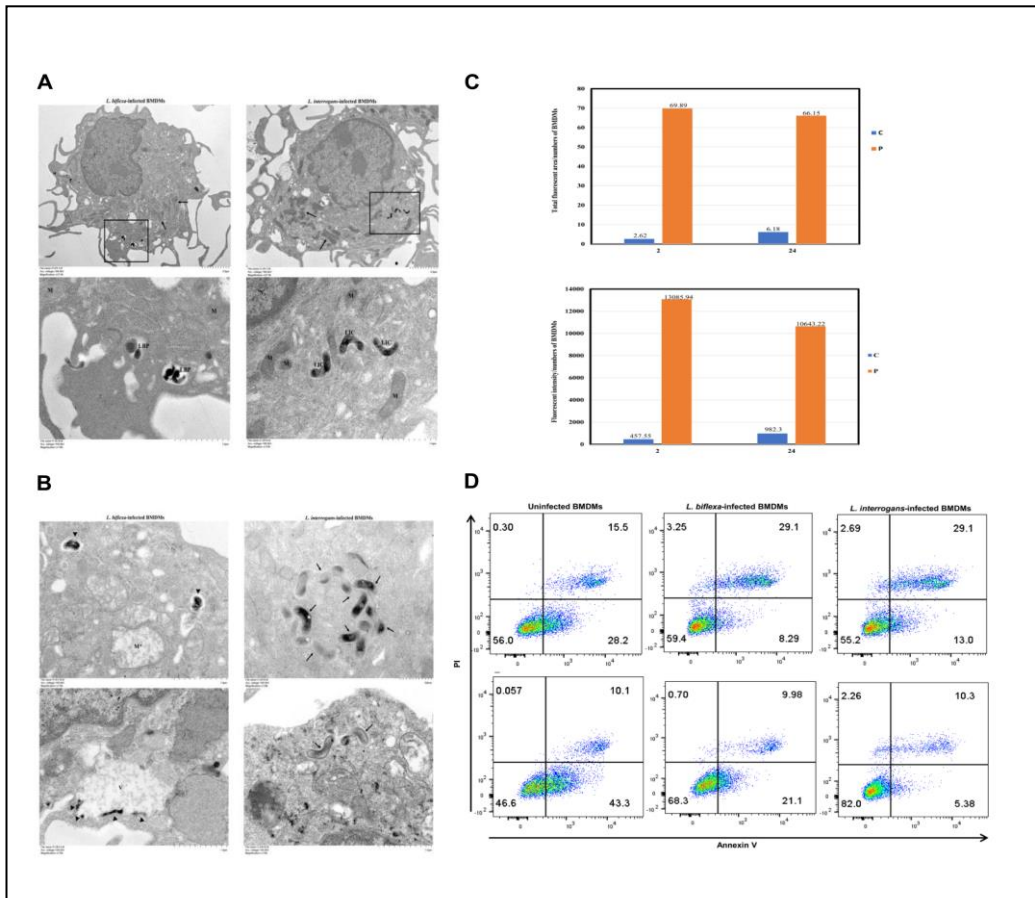

110 **FIG S2.**

111

112

113

114

115

116

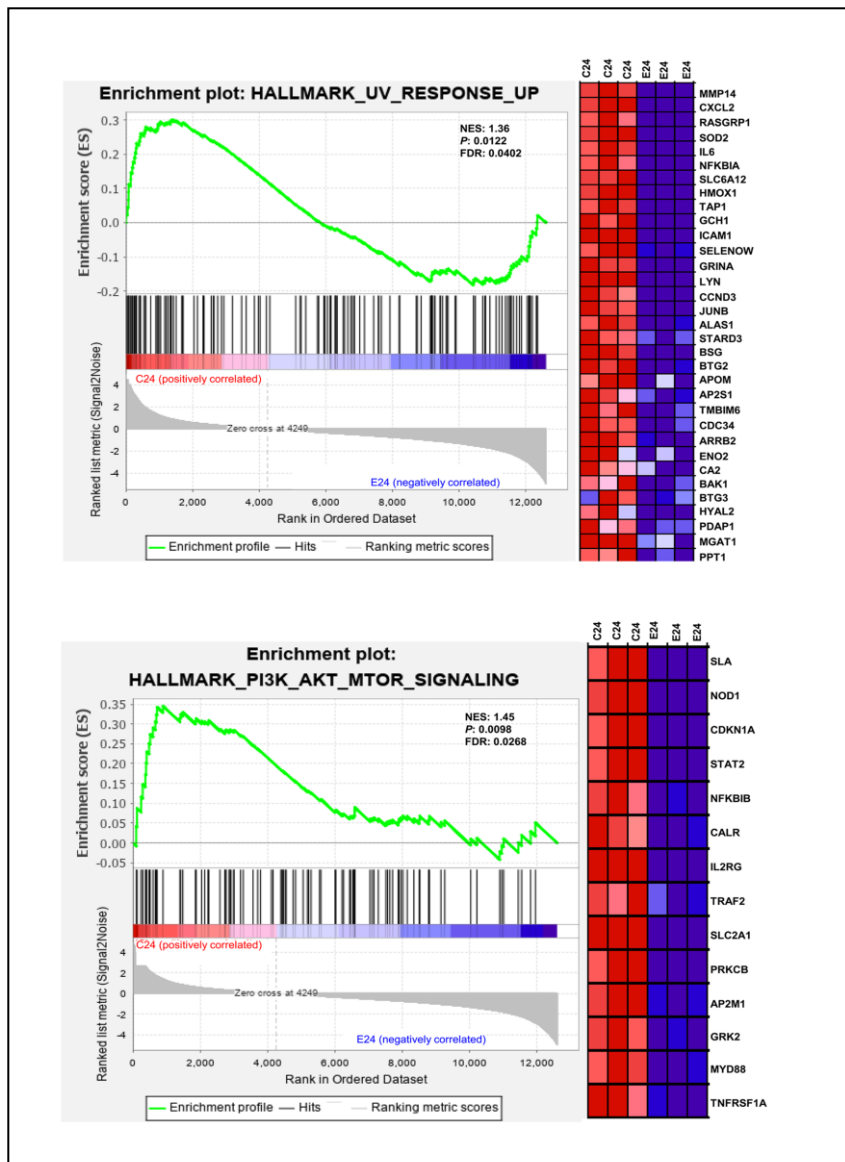

117

118

119

120

121

122

123

124

125

126

127

128

129

130

131 **FIG S3.**

132

133

134

135

136

137

138

139

140

141

142

143

144

145

146

147

148

149

150

151

152

153

154

155

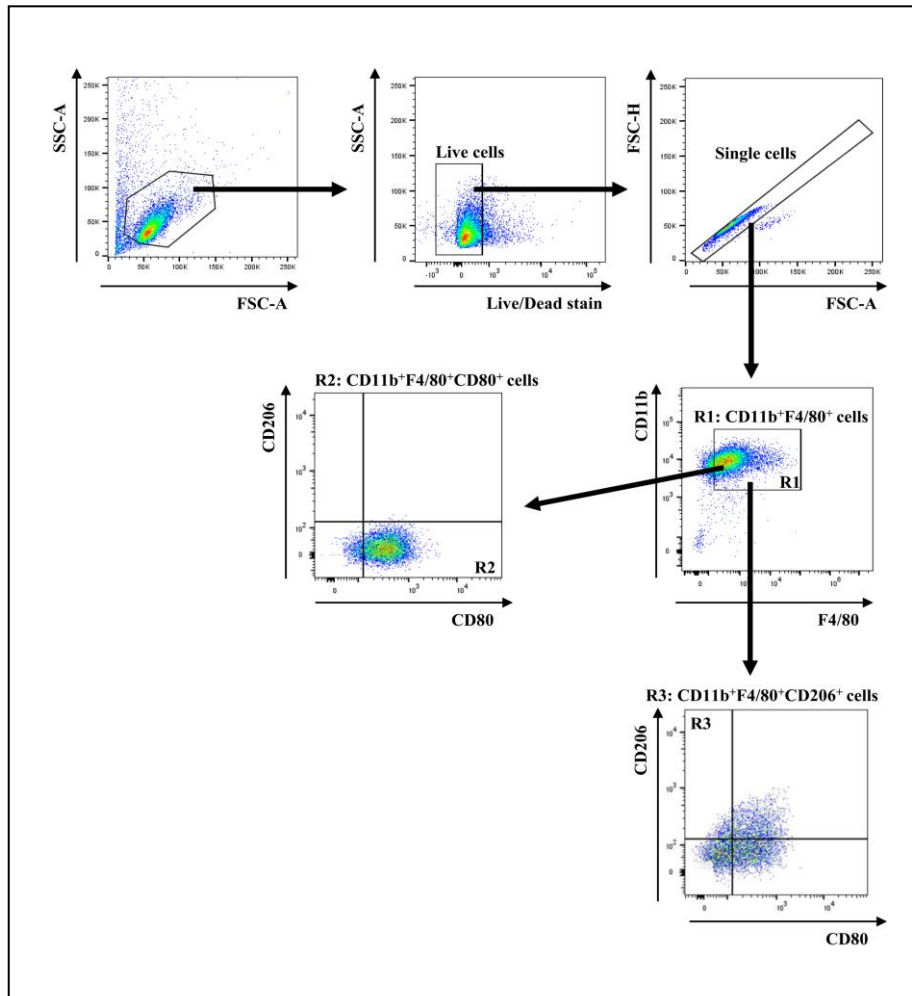

**Table S1. Summary of sequencing data and alignment statistics**

| Groups                                      | Infection times <sup>a</sup> | Samples | Total number of clean reads <sup>b</sup> | Total number of clean reads <sup>c</sup> | Total number of mapped reads <sup>d</sup> | Total mapping ratio (%) <sup>e</sup> | Total gene number |
|---------------------------------------------|------------------------------|---------|------------------------------------------|------------------------------------------|-------------------------------------------|--------------------------------------|-------------------|
| <b>Uninfected BMDMs</b>                     | 2                            | 1       | 60.81                                    | 60,792,594                               | 59,212,335                                | 97.40                                | 24,495            |
|                                             |                              | 2       | 57.26                                    | 57,241,093                               | 55,611,226                                | 97.15                                | 24,468            |
|                                             |                              | 3       | 65.97                                    | 65,943,574                               | 64,229,828                                | 97.40                                | 24,661            |
|                                             | 24                           | 1       | 62.26                                    | 62,255,382                               | 60,667,230                                | 97.45                                | 32,874            |
|                                             |                              | 2       | 60.39                                    | 60,388,092                               | 58,725,491                                | 97.25                                | 33,194            |
|                                             |                              | 3       | 79.18                                    | 79,172,384                               | 77,212,919                                | 97.53                                | 34,304            |
| <b><i>L. biflexa</i>-infected BMDMs</b>     | 2                            | 1       | 60.58                                    | 60,563,231                               | 59,205,948                                | 97.76                                | 23,406            |
|                                             |                              | 2       | 61.90                                    | 61,876,066                               | 60,205,229                                | 97.30                                | 23,725            |
|                                             |                              | 3       | 63.74                                    | 63,706,692                               | 62,162,068                                | 97.58                                | 23,411            |
|                                             | 24                           | 1       | 70.52                                    | 70,520,481                               | 68,275,316                                | 96.82                                | 34,588            |
|                                             |                              | 2       | 81.37                                    | 81,363,336                               | 78,895,826                                | 96.97                                | 33,625            |
|                                             |                              | 3       | 62.55                                    | 62,547,567                               | 60,181,836                                | 96.22                                | 32,388            |
| <b><i>L. interrogans</i>-infected BMDMs</b> | 2                            | 1       | 55.45                                    | 55,429,633                               | 54,046,002                                | 97.50                                | 22,984            |
|                                             |                              | 2       | 59.81                                    | 59,785,235                               | 58,571,055                                | 97.97                                | 22,919            |
|                                             |                              | 3       | 55.90                                    | 55,877,445                               | 54,412,993                                | 97.38                                | 23,238            |
|                                             | 24                           | 1       | 47.95                                    | 47,951,630                               | 46,287,713                                | 96.53                                | 32,695            |
|                                             |                              | 2       | 57.20                                    | 57,192,970                               | 55,195,931                                | 96.51                                | 31,560            |
|                                             |                              | 3       | 53.23                                    | 53,231,811                               | 51,516,773                                | 96.78                                | 31,140            |

<sup>a</sup> Infection times, hours<sup>b</sup> Total number of raw reads: The reads amount before filtering, Unit: Mb<sup>c</sup> Total number of clean reads: The number of clean reads after filtering; removal of low quality sequence (Quality value  $\geq 20$ ; sequencing reads trimming and quality control using CLC Genomics Workbench v10.1 (CLC Bio, Denmark))<sup>d</sup> Total clean reads alignment and mapping on to the reference genome (*Mus musculus* GRCm38)



161 <sup>e</sup> Total mapping ratio (%): The percentage of mapped reads

162

163

164

165

166

167

168

169

170

171

172

173

174

175

176

177

178

179

180

181

182

183

184

185

186

187

188

189

190

191

192

193

194

195

**Table S3. List of candidate genes for Taqman probe ID.**

| <b>Gene symbol</b> | <b>Gene name</b>                                       | <b>TaqMan assay ID</b> |
|--------------------|--------------------------------------------------------|------------------------|
| NLRP3              | NLR family, pyrin domain containing 3                  | Mm00840904_m1          |
| TLR1               | Toll-like receptor 1                                   | Mm00446095_m1          |
| TLR2               | Toll-like receptor 2                                   | Mm00442346_m1          |
| TNF-a              | Tumor necrosis factor-alpha                            | Mm99999068_m1          |
| IL-10              | Interleukin 10                                         | Mm00439614_m1          |
| CCL2               | Chemokine (C-C motif) ligand 2; MCP-1                  | Mm00441242_m1          |
| IL-6               | Interleukin 6                                          | Mm01210733_m1          |
| CXCL1              | Chemokine (C-X-C motif) ligand 1                       | Mm04207460_m1          |
| CCR1               | Chemokine (C-C motif) receptor 1                       | Mm00438260_s1          |
| Emr1               | EGF-like module containing, mucin-like, hormone; F4/80 | Mm00802529_m1          |
| HIF-1a             | Hypoxia inducible factor 1, alpha subunit              | Mm01283761_g1          |
| GAPDH              | Glyceraldehyde-3-phosphate dehydrogenase               | Mm99999915_g1          |

196

197

198

199

200

201

202

203

204
